# Supplementary material
Source: HighWire-hosted journal article supplement (https://ard.bmj.com/content/80/10/1306)

## Supplement Figure 1

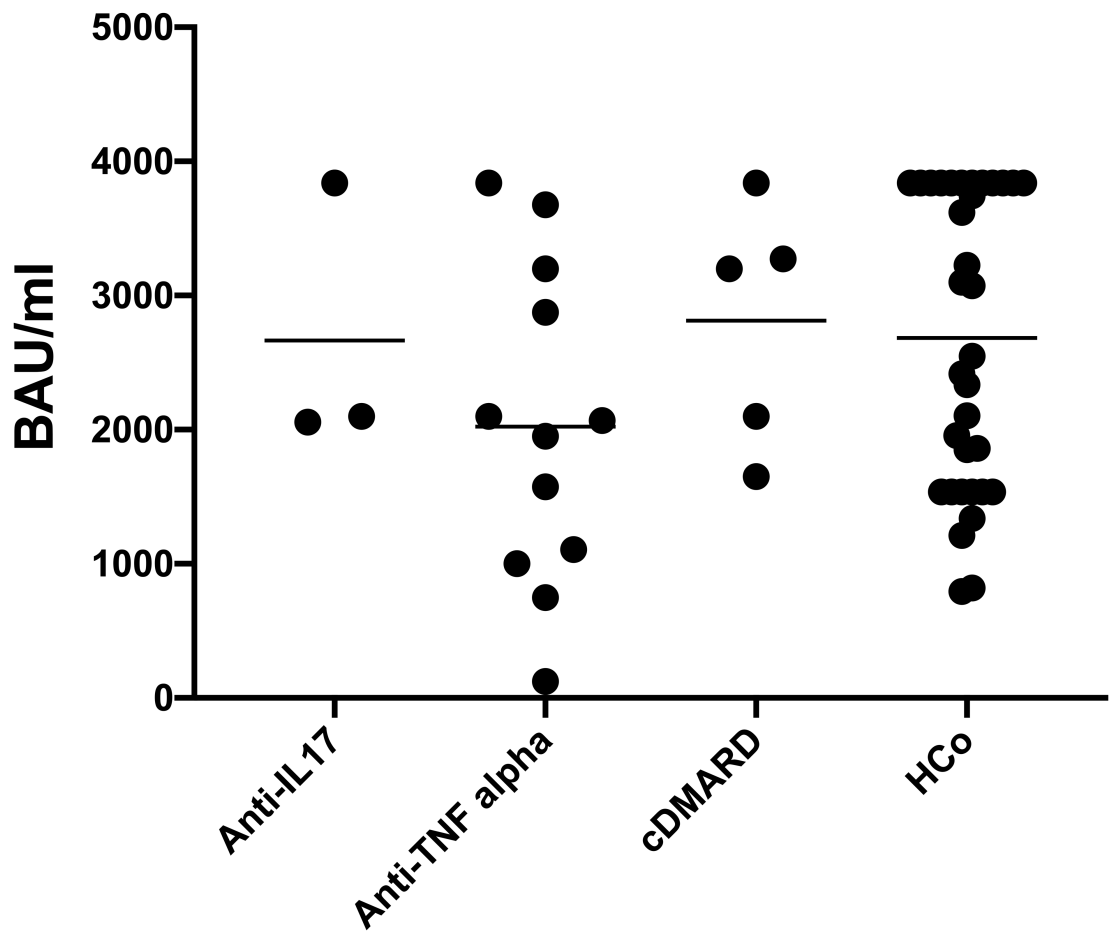

Supplement: inline-supplementary-material-1 [file inline-supplementary-material-1.pdf]
